# Supplementary material for: Correction: A Mixture of Delta-Rules Approximation to Bayesian Inference in Change-Point Problems
Source: PubMed Central journal article supplement (PMC6019100; doi:10.1371/journal.pcbi.1006210), 2018-06-26
Supplement: pcbi.1006210.s002.pdf [file pcbi.1006210.s002.pdf]

## Tables

| Model         | parameter  | correlation coefficient | $p$ -value            |
|---------------|------------|-------------------------|-----------------------|
| Full          | $h$        | $r = 0.92$              | $p = 0$               |
|               | $\sigma_d$ | $r = 1.00$              | $p = 0$               |
| Nassar et al. | $h$        | $r = 0.99$              | $p = 0$               |
|               | $\sigma_d$ | $r = 1.00$              | $p = 0$               |
| 1-node        | $\sigma_d$ | $r = 0.99$              | $p = 0$               |
|               | $\alpha_1$ | $r = 1.00$              | $p = 0$               |
| 2-node        | $h$        | $r = 0.85$              | $p = 7.48\text{e-}18$ |
|               | $\sigma_d$ | $r = 0.94$              | $p = 4.13\text{e-}29$ |
|               | $\alpha_1$ | $r = 0.99$              | $p = 1.13\text{e-}46$ |
|               | $\alpha_2$ | $r = 0.78$              | $p = 2.36\text{e-}13$ |
| 3-node        | $h$        | $r = 0.67$              | $p = 4.79\text{e-}09$ |
|               | $\sigma_d$ | $r = 0.85$              | $p = 4.34\text{e-}18$ |
|               | $\alpha_1$ | $r = 0.96$              | $p = 1.57\text{e-}34$ |
|               | $\alpha_2$ | $r = 0.48$              | $p = 1.24\text{e-}04$ |
|               | $\alpha_3$ | $r = 0.83$              | $p = 2.84\text{e-}16$ |

**Figure S 1.** Table showing correlation coefficient between simulated and fit parameter values.
