# Supplementary material for: Correction: A Mixture of Delta-Rules Approximation to Bayesian Inference in Change-Point Problems
Source: PubMed Central journal article supplement (PMC6019100; doi:10.1371/journal.pcbi.1006210), 2018-06-26
Supplement: pcbi.1006210.s003.pdf [file pcbi.1006210.s003.pdf]

## Supplementary Material: A mixture of Delta-rules approximation to Bayesian inference in change-point problems

Robert C. Wilson<sup>1,\*</sup>, Matthew R. Nassar<sup>2</sup>, Joshua I. Gold<sup>2</sup>

**1** Princeton Neuroscience Institute, Princeton University, Princeton, NJ 08540

**2** Department of Neuroscience, University of Pennsylvania, Philadelphia, PA 19104

\* E-mail: rcw2@princeton.edu

### Full derivation of approximate error for one-node case

In order to compute the mean squared error we need expressions for **three** terms in equation 47 of the main text. These terms are:  $\langle (m^G)^2 \rangle$ ,  $\langle \mu_1 m^G \rangle$ , and  $\langle \mu_1^2 \rangle$ . We now derive these terms one at a time.

#### Term 1: $\langle (m^G)^2 \rangle$

The simplest of these is just the square mean of the prior distribution over  $m^G$  the ground truth mean; i.e.,

$$\langle (m^G)^2 \rangle = \int (m^G)^2 p(m^G | v_p, \chi_p) dm^G \quad (1)$$

This term is defined by our choice of the prior.

#### Term 2: $\langle \mu_i m^G \rangle$

To compute the second term,  $\langle \mu_i m^G \rangle$ , we first express the means,  $\mu_i$ , of the individual Delta rules as weighted sum of all previous data points; i.e.,

$$\begin{aligned} \mu_i &= \sum_{a=1}^t \alpha_i (1 - \alpha_i)^{t-a} x_a \\ &= \sum_{a=1}^t \kappa_{ia} x_a \end{aligned} \quad (2)$$

where the kernel  $\kappa_{ia} = \alpha_i (1 - \alpha_i)^{t-a}$ . Using this kernel expression for  $\mu_i$ , we can write

$$\langle \mu_i m^G \rangle = \sum_{a=1}^t \kappa_{ia} \langle x_a m^G \rangle \quad (3)$$

If there is no change-point between time  $a$  and time  $t + 1$ , then  $x_a$  is sampled from a distribution with mean  $m^G$  and we have

$$\langle x_a m^G \rangle_{\text{no change-point}} = \langle (m^G)^2 \rangle \quad (4)$$

which is just the square mean of the prior over  $m^G$ . Conversely, if there is a change-point between  $a$  and  $t + 1$ , then  $x_a$  comes from a different distribution and we have

$$\langle x_a m^G \rangle_{\text{change-point}} = \langle m_p m^G \rangle = m_p \langle m^G \rangle = m_p^2 \quad (5)$$

where  $m_p$  is the mean of the prior distribution over  $m^G$ .

Finally, to compute  $\langle x_a m^G \rangle$  we need to marginalize over the two possibilities that a change-point has occurred or not. The probability that there is no change-point between times  $a$  and  $t+1$  is  $(1-h)^{t-a+1}$  and a change happens with probability  $1 - (1-h)^{t-a+1}$ . These probabilities give us the following expression for  $\langle x_a m^G \rangle$ ,

$$\begin{aligned} \langle x_a m^G \rangle &= (1-h)^{t-a+1} \langle x_a m^G \rangle_{\text{no change-point}} + (1 - (1-h)^{t-a+1}) \langle x_a m^G \rangle_{\text{change-point}} \\ &= (1-h)^{n+1} \left( \langle (m^G)^2 \rangle - m_p^2 \right) + m_p^2 \\ &= (1-h)^{n+1} \xi_0 + \xi_1 \end{aligned} \quad (6)$$

where we have defined  $n = t - a$ ,  $\xi_0 = \langle (m^G)^2 \rangle - m_p^2$  and  $\xi_1 = m_p^2$ . Thus we can write

$$\begin{aligned} \langle \mu_i m^G \rangle &= \sum_{n=0}^{t-1} \alpha_i (1-\alpha_i)^n (\xi_0 (1-h)^{n+1} + \xi_1) \\ &= \frac{\xi_0 \alpha_i (1-h) (1 - (1-\alpha_i)^t (1-h)^t)}{1 - (1-\alpha_i)(1-h)} + \xi_1 (1 - (1-\alpha_i)^t) \end{aligned} \quad (7)$$

### Term 3: $\langle \mu_i \mu_j \rangle$

For completeness, we consider the general case of average of two means,  $\mu_i$  and  $\mu_j$ , generated with two separate learning rates. The specific case,  $\langle \mu_1^2 \rangle$  is easily computed from this by setting  $i = j = 1$ .

$\langle \mu_i \mu_j \rangle$ , is calculated in a similar manner to  $\langle \mu_i m^G \rangle$ . Using the kernel expression for  $\mu_i$  (equation 2), we can write

$$\begin{aligned} \langle \mu_i \mu_j \rangle &= \sum_{a=1}^t \sum_{b=1}^t \kappa_{ia} \kappa_{jb} \langle x_a x_b \rangle \\ &= C(0) \sum_{a=1}^t \kappa_{ia} \kappa_{ja} + \sum_{n=1}^t C(n) \left[ \sum_{a=1}^{t-n} \kappa_{ia} \kappa_{ja+n} + \sum_{a=n+1}^t \kappa_{ia} \kappa_{ja-n} \right] \end{aligned} \quad (8)$$

where we have introduced the function  $C(n)$  to denote the average correlation between data points that are  $n$  time points apart; i.e.,

$$\begin{aligned} C(0) &= \langle x_a^2 \rangle \\ C(n) &= \langle x_a x_{a+n} \rangle \end{aligned} \quad (9)$$

If we assume that the data come from a change-point process with hazard rate  $h$ , then we can compute the form of  $C(n)$ . If a change-point occurs between time  $a$  and time  $a+n$ , then both  $x_a$  and  $x_{a+n}$  are sampled from the same generative distribution. In this case  $\langle x_a x_{a+n} \rangle$  is simply the mean square of the prior over  $\mu$ ; i.e.,

$$\begin{aligned} \langle x_a x_{a+n} \rangle_{\text{no change-point}} &= \zeta_0 \\ &= \int \int \int x_a x_{a+n} p(x_a | \mu) p(x_{a+n} | \mu) p(\mu | v_p, \chi_p) dx_a dx_{a+n} d\mu \\ &= \int p(\mu | v_p, \chi_p) \mu^2 d\mu \end{aligned} \quad (10)$$

If there is a change-point between time  $a$  and time  $a+n$  then the parameters of the generating distributions are different. In this case we have that  $\langle x_a x_{a+n} \rangle$  is the square mean of the prior; i.e.,

$$\langle x_a x_{a+n} \rangle_{\text{change-point}} = \zeta_1 = \left[ \int p(\mu | v_p, \chi_p) \mu d\mu \right]^2 \quad (11)$$

Thus we can write

$$\begin{aligned} C(n) &= (1-h)^n \langle x_a x_{a+n} \rangle_{\text{no change-point}} + (1 - (1-h)^n) \langle x_a x_{a+n} \rangle_{\text{change-point}} \\ &= (\zeta_0 - \zeta_1)(1-h)^n + \zeta_1 \end{aligned} \quad (12)$$

Now, since all of the sums in equation 8 are geometric progressions they can be written in closed form,

$$\begin{aligned} \sum_{a=1}^{t-n} \kappa_{ia} \kappa_{ja+n} &= \frac{\alpha_i \alpha_j (1-\alpha_i)^n (1 - (1-\alpha_i)^{t-n} (1-\alpha_j)^{t-n})}{1 - (1-\alpha_i)(1-\alpha_j)} \\ &= \Theta_{ij}(n) \end{aligned} \quad (13)$$

Note that, by symmetry,

$$\sum_{a=n+1}^t \kappa_{ia} \kappa_{ja-n} = \sum_{a=1}^{t-n} \kappa_{ja} \kappa_{ia+n} = \Theta_{ji}(n) \quad (14)$$

and we also have

$$\sum_{a=1}^t \kappa_{ia} \kappa_{ja} = \Theta_{ij}(0) \quad (15)$$

Next the sums over  $n$  can be computed as

$$\begin{aligned} \sum_{n=1}^t C(n) \Theta_{ij}(n) &= \frac{\alpha_i \alpha_j}{1 - (1-\alpha_i)(1-\alpha_j)} \left[ \sum_{n=1}^t C(n) (1-\alpha_i)^n - (1-\alpha_i)^t \sum_{n=1}^t C(n) (1-\alpha_j)^{t-n} \right] \\ &= \frac{\alpha_i \alpha_j}{1 - (1-\alpha_i)(1-\alpha_j)} (S_i^1 - (1-\alpha_i)^t S_j^2) \end{aligned} \quad (16)$$

where

$$S_i^1 = \frac{(\zeta_0 - \zeta_1)(1-h)(1-\alpha_i)(1 - (1-h)^t (1-\alpha_i)^t)}{1 - (1-\alpha_i)(1-h)} + \frac{\zeta_1(1-\alpha_i)(1 - (1-\alpha_i)^t)}{\alpha_i} \quad (17)$$

and

$$S_j^2 = (\zeta_0 - \zeta_1)(1-h) \frac{(1-\alpha_j)^t - (1-h)^t}{h - \alpha_j} - \frac{\zeta_1((1-\alpha_j)^t - 1)}{\alpha_j} \quad (18)$$

Which gives us the following expression for  $\langle \mu_i \mu_j \rangle$

$$\begin{aligned} \langle \mu_i \mu_j \rangle &= \frac{\alpha_i \alpha_j (1 - (1-\alpha_i)^t (1-\alpha_j)^t)}{1 - (1-\alpha_i)(1-\alpha_j)} C(0) + \frac{\alpha_i \alpha_j}{1 - (1-\alpha_i)(1-\alpha_j)} (S_i^1 - (1-\alpha_i)^t S_j^2) \\ &\quad + \frac{\alpha_i \alpha_j}{1 - (1-\alpha_i)(1-\alpha_j)} (S_j^1 - (1-\alpha_j)^t S_i^2) \end{aligned} \quad (19)$$
